# Supplementary material
Source: PubMed Central journal article supplement (PMC4783425)
Supplement: CVI.00597-15_zcd999095317so1.pdf [file CVI.00597-15_zcd999095317so1.pdf]

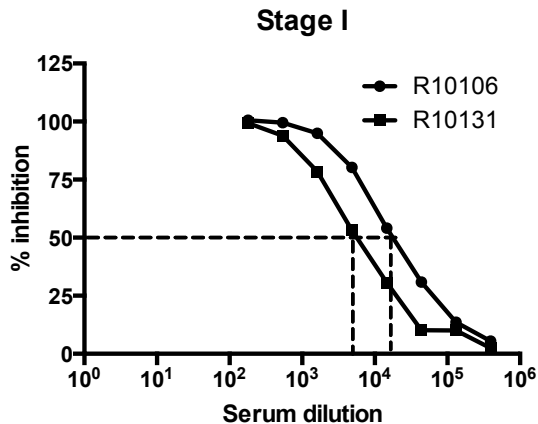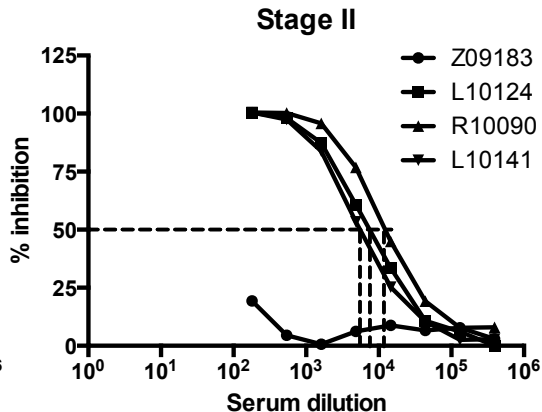

Supplementary Figure S1. Dose dependent inhibition of SF162 Env pseudotyped HIV-1 virus infection from a representative experiment. 150 TCID<sub>50</sub>/mL of SF162 Env pseudotyped HIV-1 viruses were incubated with serial dilution of serum samples and then used for infection of TZM-bl cells. Y-axis shows the percent inhibition of virus infection in serum dilutions compared to the virus incubated with pre-immune sera. Inhibitory dilution 50 or ID<sub>50</sub> is defined as the reciprocal serum dilution that resulted in 50% reduction of infectivity (dotted lines) in the TZM-bl assay.

Supplementary Table S1: Neutralization activity against a panel of HIV-1 viruses pseudotyped with Env from diverse isolates

| Animal No. | Weeks after primary immunization* | Env pseudotyped viruses used as indicators in neutralization assay |                      |               |         |                   |                   |          |        |          |
|------------|-----------------------------------|--------------------------------------------------------------------|----------------------|---------------|---------|-------------------|-------------------|----------|--------|----------|
|            |                                   | Subtype 02A1                                                       | Subtype A1           | Subtype 02_AG |         | Subtype B         |                   |          |        |          |
|            |                                   | 242-14                                                             | Q23 <sub>ENV17</sub> | 271-11        | DJ263.8 | 1012-11.TC21.3257 | 1056-10.TA11.1826 | SS1196.1 | BAL.26 | SF162.LS |
| Z09183     | Wk 22                             | –                                                                  | –                    | –             | –       | –                 | –                 | –        | –      | –        |
|            | Wk 26                             | –                                                                  | –                    | –             | –       | –                 | –                 | 80       | 93     | 99       |
|            | Wk 36                             | –                                                                  | –                    | –             | –       | –                 | 52                | –        | 53     | 99       |
| L10124     | Wk 22                             | –                                                                  | –                    | –             | 50      | –                 | –                 | 54       | 74     | 97       |
|            | Wk 26                             | –                                                                  | –                    | –             | –       | –                 | –                 | –        | –      | 98       |
|            | Wk 36                             | –                                                                  | –                    | –             | –       | –                 | –                 | –        | 57     | 99       |
| R10090     | Wk 22                             | –                                                                  | –                    | –             | –       | –                 | –                 | –        | –      | 99       |
|            | Wk 26                             | –                                                                  | –                    | –             | –       | –                 | –                 | –        | –      | 99       |
|            | Wk 36                             | –                                                                  | –                    | –             | –       | –                 | –                 | –        | –      | 99       |
| L10141     | Wk 22                             | –                                                                  | –                    | –             | –       | –                 | –                 | –        | –      | 99       |
|            | Wk 26                             | –                                                                  | –                    | –             | –       | –                 | –                 | –        | –      | 98       |
|            | Wk 36                             | –                                                                  | –                    | –             | –       | –                 | –                 | –        | –      | 95       |

\*' Wk 22 samples were collected 2 weeks after the gp120 boost ; Wk 26 and Wk 36 samples were collected, respectively, at 2 and 12 weeks after intrarectal SHIV challenge. Please see Figure 2 and Materials and Methods for details.

Numbers in the table refer to the percent reduction of virus infectivity as measured by Relative Luciferase Units (RLU) in TZM-bl cells (see Materials and Methods). '–' indicates less than 50% inhibition in the presence of sera at 1:20 dilution. HIV-1 viruses pseudotyped with Env from Murine leukemia virus was used as a control for non-specific activities.
